# Supplementary material
Source: Springer Nature journal article supplement (https://www.springermedizin.de/resource/supplementary/12936_2009_891_MOESM17_ESM.pdf/9548478)
Supplement: MOESM17 [file 9548478]

Mean temperature

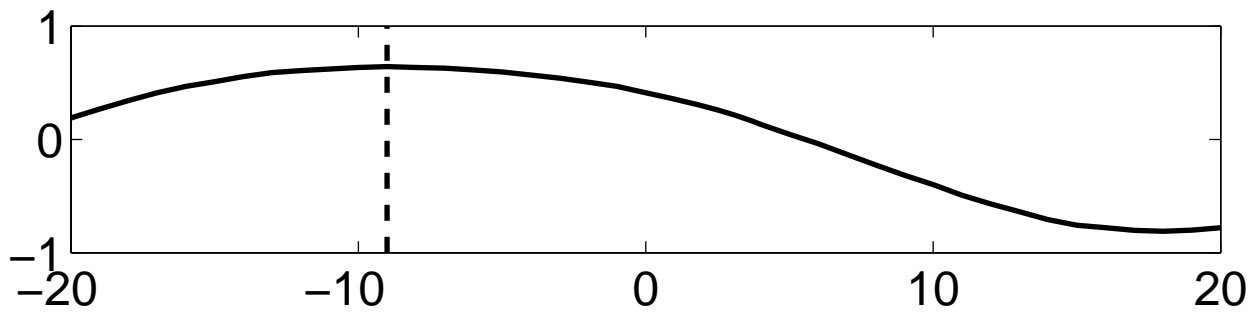

Minimum temperature

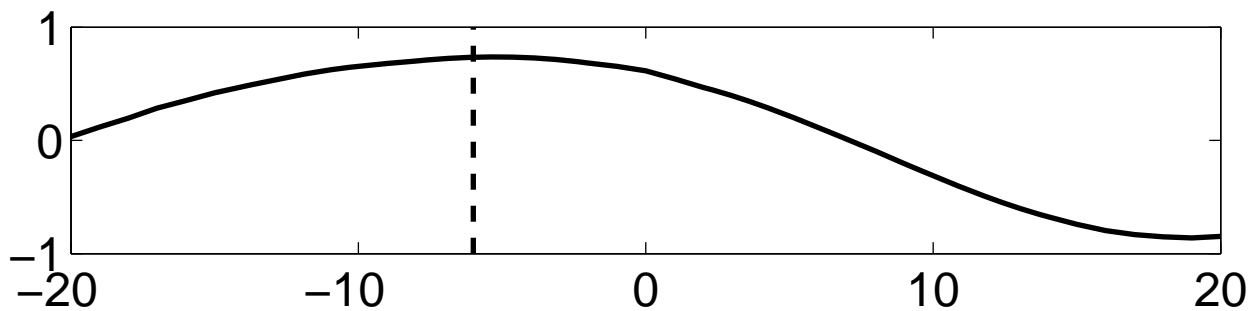

Maximum temperature

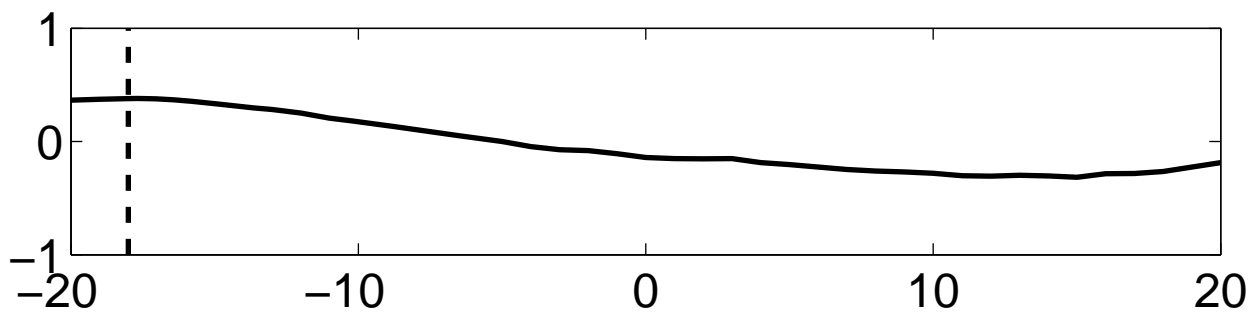

Precipitation

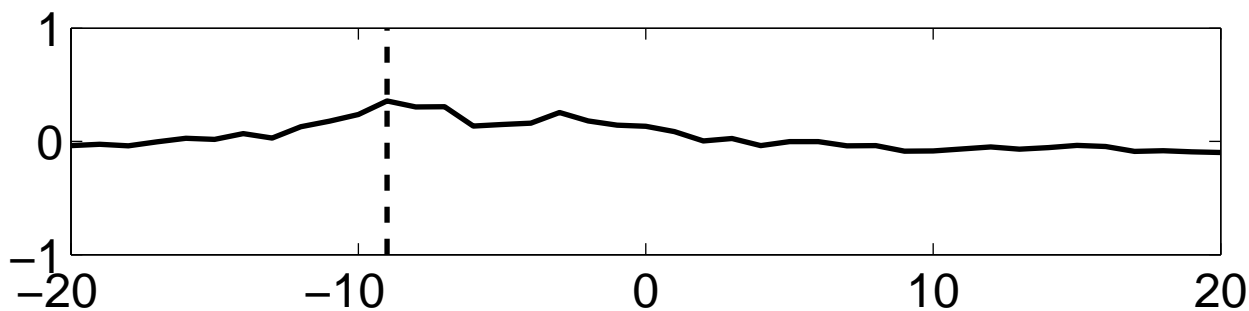

*P. vivax* malaria cases

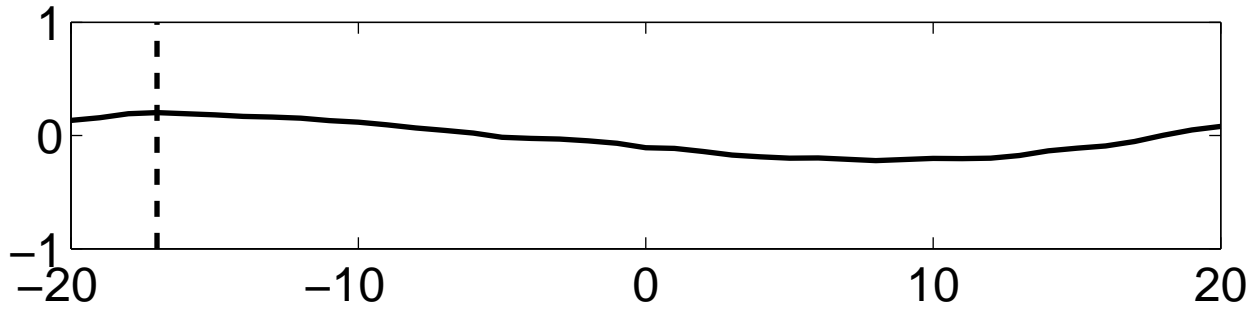

Time lag (weeks)
